# Supplementary figures and images for: Robust Normalization of Luciferase Reporter Data
Source: MDPI journal article supplement (doi:10.3390/mps2030062), 2019-07-25

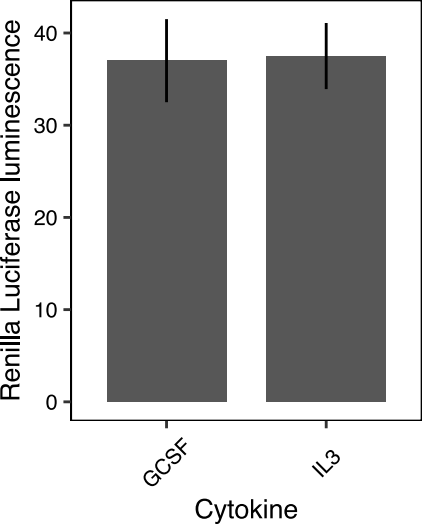

Supplement: s1 [file s1]
